# Supplementary material for: Evolutionary and ecological processes influencing chemical defense variation in an aposematic and mimetic Heliconius butterfly
Source: PeerJ journal article supplement (doi:10.7717/peerj.11523), 2021-06-18
Supplement: Supplementary_File_1.pdf [file Supplementary_File_1.pdf]

**TITLE. Evolutionary and ecological processes influencing chemical defense variation in an aposematic and mimetic *Heliconius* butterfly**

**Supplementary File 1**

**Table S1A.** Cyanogenic glucoside compound concentrations (mean, standard deviation (SD) and *P*-values of Tukey HSD pairwise comparisons) in natural populations of *Heliconius erato* and *Passiflora biflora* sampled along environmental gradients in Panama and Ecuador. Statistically significant pairwise comparisons are marked in bold.

| <i>H. erato</i> |              | <u>Linamarin %</u> |       |                                                  |                  |                  | <u>Lotaustralin %</u> |      |       |       |                                                  | <u>Total cyanogen %</u> |                  |       |       |       |                  |                                                  |                  |       |     |      |
|-----------------|--------------|--------------------|-------|--------------------------------------------------|------------------|------------------|-----------------------|------|-------|-------|--------------------------------------------------|-------------------------|------------------|-------|-------|-------|------------------|--------------------------------------------------|------------------|-------|-----|------|
| Country         | Population   | Mean               | SD    | Pairwise comparisons (Tukey HSD <i>P</i> -value) |                  |                  |                       |      | Mean  | SD    | Pairwise comparisons (Tukey HSD <i>P</i> -value) |                         |                  |       |       | Mean  | SD               | Pairwise comparisons (Tukey HSD <i>P</i> -value) |                  |       |     |      |
|                 |              |                    |       | Dry                                              | Int              | Wet              | Low                   | High |       |       | Dry                                              | Int                     | Wet              | Low   | High  |       |                  | Dry                                              | Int              | Wet   | Low | High |
| Panama          | Dry          | 0.771              | 0.557 |                                                  |                  |                  |                       |      | 0.293 | 0.177 |                                                  |                         |                  |       |       | 1.064 | 0.709            |                                                  |                  |       |     |      |
| Panama          | Intermediate | 0.776              | 0.465 | 0.997                                            |                  |                  |                       |      | 0.495 | 0.218 | <b>&lt;0.001</b>                                 |                         |                  |       | 1.271 | 0.631 | 0.432            |                                                  |                  |       |     |      |
| Panama          | Wet          | 0.569              | 0.356 | 0.445                                            | 0.295            |                  |                       |      | 0.337 | 0.198 | 0.766                                            | <b>0.007</b>            |                  |       | 0.907 | 0.521 | 0.905            | 0.098                                            |                  |       |     |      |
| Ecuador         | Low          | 0.011              | 0.028 | <b>&lt;0.001</b>                                 | <b>&lt;0.001</b> | <b>&lt;0.001</b> |                       |      | 0.000 | 0.000 | <b>&lt;0.001</b>                                 | <b>&lt;0.001</b>        | <b>&lt;0.001</b> |       | 0.011 | 0.028 | <b>&lt;0.001</b> | <b>&lt;0.001</b>                                 | <b>&lt;0.001</b> |       |     |      |
| Ecuador         | High         | 0.026              | 0.033 | <b>&lt;0.001</b>                                 | <b>&lt;0.001</b> | <b>&lt;0.001</b> | 0.911                 |      | 0.000 | 0.000 | <b>&lt;0.001</b>                                 | <b>&lt;0.001</b>        | <b>&lt;0.001</b> | 1.000 | 0.026 | 0.033 | <b>&lt;0.001</b> | <b>&lt;0.001</b>                                 | <b>&lt;0.001</b> | 0.936 |     |      |

  

| <i>P. biflora</i> |              | <u>Passiflorin (µg/mg)</u> |        |                                                  | <u>Passiflorin triglycoside (µg/mg)</u> |     |       | <u>Tetraphyllin A (µg/mg)</u> |                                                  |       | <u>Total cyanogens (µg/mg)</u> |       |       |                                                  |       |     |        |        |              |       |  |
|-------------------|--------------|----------------------------|--------|--------------------------------------------------|-----------------------------------------|-----|-------|-------------------------------|--------------------------------------------------|-------|--------------------------------|-------|-------|--------------------------------------------------|-------|-----|--------|--------|--------------|-------|--|
| Country           | Population   | Mean                       | SD     | Pairwise comparisons (Tukey HSD <i>P</i> -value) |                                         |     | Mean  | SD                            | Pairwise comparisons (Tukey HSD <i>P</i> -value) |       |                                | Mean  | SD    | Pairwise comparisons (Tukey HSD <i>P</i> -value) |       |     |        |        |              |       |  |
|                   |              |                            |        | Dry                                              | Int                                     | Wet |       |                               | Dry                                              | Int   | Wet                            |       |       | Dry                                              | Int   | Wet | Dry    | Int    | Wet          |       |  |
| Panama            | Dry          | 11.005                     | 9.459  |                                                  |                                         |     | 0.732 | 0.620                         |                                                  |       |                                | 0.113 | 0.416 |                                                  |       |     | 11.850 | 10.073 |              |       |  |
| Panama            | Intermediate | 20.291                     | 12.925 | <b>0.035</b>                                     |                                         |     | 1.166 | 0.654                         | 0.126                                            |       |                                | 0.087 | 0.289 | 0.970                                            |       |     | 21.544 | 13.586 | <b>0.038</b> |       |  |
| Panama            | Wet          | 17.095                     | 7.528  | 0.123                                            | 0.653                                   |     | 0.911 | 0.497                         | 0.598                                            | 0.478 |                                | 0.000 | 0.000 | 0.448                                            | 0.709 |     | 18.005 | 7.953  | 0.146        | 0.627 |  |

**Table S1B.** Variance components of *Heliconius* biosynthesized cyanogenic toxicity estimated with REML animal models. For each variance component, Variance ( $V$ ), Standard error ( $S.E.$ ) of variance, Statistical significance ( $P$ ) of variance, and Proportion of variance of total phenotypic variance ( $V/V_P$ ) are shown. In addition, broad-sense heritability  $H^2$  ( $V_G/V_P$ ) and evolvability  $e_\mu$  ( $V_G/\mu^2$ ; %) are calculated based on the genetic variance component (shaded columns). Data consists of 322 observations, including 20 mothers, 13 fathers, and 289 F1 offspring belonging to 20 broods (of which 18 are full-siblings, and 2 are paternal half-siblings).

| Model type | Cyanogen trait | Trait mean ( $\mu$ ) | Genetic variance component, heritability and evolvability |            |         |                        |                                  | Maternal variance |                     |             |               | Fixed effects     |                     |           |               | Residual variance |                 |           | Total phenotypic variance |           |                     |           |               |
|------------|----------------|----------------------|-----------------------------------------------------------|------------|---------|------------------------|----------------------------------|-------------------|---------------------|-------------|---------------|-------------------|---------------------|-----------|---------------|-------------------|-----------------|-----------|---------------------------|-----------|---------------------|-----------|---------------|
|            |                |                      | $V_G$                                                     | $V_G S.E.$ | $P V_G$ | $H^2$<br>( $V_G/V_P$ ) | $e_\mu$<br>( $V_G/\mu^2$ );<br>% | $V_{mat}$         | $S.E.$<br>$V_{mat}$ | $P V_{mat}$ | $V_{mat}/V_P$ | Feeding treatment |                     | Sex       |               | $V_R$             | $S.E.$<br>$V_R$ | $V_R/V_P$ | $V_P$                     |           |                     |           |               |
|            |                |                      |                                                           |            |         |                        |                                  |                   |                     |             |               | $V_{trm}$         | $S.E.$<br>$V_{trm}$ | $P_{trm}$ | $V_{trm}/V_P$ |                   |                 |           |                           | $V_{sex}$ | $S.E.$<br>$V_{sex}$ | $P_{sex}$ | $V_{sex}/V_P$ |
| 1          | Total CNglc %  | 0.772                | 0.0093                                                    | 0.0069     | 0.0368  | 0.1152                 | 1.5548                           |                   |                     |             | 0.001         | 7.E-05            | 0.467               | 0.011     | 0.001         | 7.E-05            | 0.057           | 0.011     | 0.070                     | 0.008     | 0.874               | 0.0805    |               |
| 1          | Linamarin %    | 0.577                | 0.0063                                                    | 0.0043     | 0.0202  | 0.1387                 | 1.8869                           |                   |                     |             | 5.E-05        | 4.E-06            | 0.418               | 0.001     | 0.001         | 5.E-05            | 0.036           | 0.013     | 0.038                     | 0.004     | 0.848               | 0.0453    |               |
| 1          | Lotaustralin % | 0.195                | 4.0E-04                                                   | 3.9E-04    | 0.1304  | 0.0668                 | 1.0394                           |                   |                     |             | 5.E-05        | 4.E-06            | 0.621               | 0.008     | 3.E-05        | 2.E-06            | 0.224           | 0.004     | 0.005                     | 0.001     | 0.929               | 0.0059    |               |
| 2          | Total CNglc %  | 0.772                | 1.0E-07                                                   | 0.0312     | 1.0000  | 1.4E-06                | 1.7E-05                          | 0.007             | 0.013               | 1.000       | 0.102         | 0.003             | 2.E-04              | 0.134     | 0.043         | 2.E-04            | 1.E-05          | 0.378     | 0.002                     | 0.065     | 0.018               | 0.895     | 0.0727        |
