# Supplementary material for: Evolutionary and ecological processes influencing chemical defense variation in an aposematic and mimetic Heliconius butterfly
Source: PeerJ journal article supplement (doi:10.7717/peerj.11523), 2021-06-18
Supplement: Supplementary_File_2.pdf [file Supplementary_File_2.pdf]

**TITLE. Evolutionary and ecological processes influencing chemical defense variation in an aposematic and mimetic *Heliconius* butterfly**

**Supplementary File 2**

**Table S2:** Summary of *Heliconius erato* broods.

| <b>Mother id</b> | <b>Father id</b> | <b>Offspring<br/>n</b> | <b>Feeding<br/>treatment</b> |
|------------------|------------------|------------------------|------------------------------|
| 1031             | N.A.             | 7                      | NO                           |
| 1049             | 1029             | 6                      | NO                           |
| 1059             | 1037             | 7                      | NO                           |
| 1062             | N.A.             | 12                     | NO                           |
| 1070             | N.A.             | 10                     | NO                           |
| 1076             | 1030             | 10                     | NO                           |
| 1083             | 1030             | 9                      | NO                           |
| 1126             | N.A.             | 9                      | NO                           |
| 1129             | 1100             | 8                      | NO                           |
| 1142             | N.A.             | 7                      | NO                           |
| 1685             | N.A.             | 12                     | NO                           |
| 1687             | 1421             | 8                      | NO                           |
| 1691             | 1657             | 6                      | NO                           |
| 1799             | 1664             | 5                      | NO                           |
| 1346             | 1291             | 38                     | YES                          |
| 1404             | 1238             | 42                     | YES                          |
| 1446             | 1224             | 20                     | YES                          |
| 1850             | 1722             | 25                     | YES                          |
| 1860             | 1729             | 16                     | YES                          |
| 2193             | 2120             | 32                     | YES                          |
| <b>n</b>         | <b>20</b>        | <b>13</b>              | <b>289</b>                   |
|                  |                  | <b>Total n:</b>        | <b>322</b>                   |
