# Supplementary material for: Evolutionary and ecological processes influencing chemical defense variation in an aposematic and mimetic Heliconius butterfly
Source: PeerJ journal article supplement (doi:10.7717/peerj.11523), 2021-06-18
Supplement: Supplementary_File_4.pdf [file Supplementary_File_4.pdf]

1 **Title: Evolutionary and ecological processes influencing chemical defense variation in an aposematic**  
2 **and mimetic *Heliconius* butterfly**

3  
4 **SUPPLEMENTARY FILE 4**

5 **SUPPLEMENTARY METHODS**

6  
7 **Further information on the study species *Heliconius erato***

8 *Heliconius erato* (Lepidoptera: Nymphalidae) is a widespread neotropical butterfly found in ecologically  
9 diverse habitats across its large geographic range extending from northern Argentina to Mexico. A striking  
10 diversity of color-pattern forms with region-specific wing patterns have evolved as mimics sharing  
11 aposematic coloration with other species, typically *H. melpomene*, in order to deter common predators  
12 (Supple et al., 2013). The color forms are associated with local color pattern mimicry rings, the size of which  
13 vary from a few comimetic species in Central America to up to a dozen in the Amazon, and region-specific:  
14 similar between comimetic species within any one area, but changing in concert across the geographic range  
15 (Supple et al., 2013; Jiggins, 2017). *Heliconius erato* has a restricted home range and a dispersal distance of  
16 around 1-2 km per generation (Turner, 1971). The larvae can feed on several *Passiflora* species, depending  
17 on the local quantity and quality of available hosts (Kerpel & Moreira, 2005). In the Panamanian study area,  
18 the main natural hosts of *H. erato* are *P. biflora*, *P. coriaceae* and to a lesser extent *P. auriculata* (Merrill et  
19 al., 2013), while the preferred host plants in Ecuador are not well known (but possibly include *P. punctate*;  
20 (Hay-Roe & Nation, 2007). Cyanogenic toxicity of *H. erato* is moderate compared to other *Heliconius*  
21 species and arise from both biosynthesized and sequestered toxins, depending on the host on which it feeds  
22 (Arias et al., 2016; de Castro et al., 2019).

23  
24 **Study sites and field collection of butterflies and host plants**

25 *Heliconius erato demophoon* butterflies and its typical host plant *P. biflora* were collected from forest and  
26 forest-edge populations in Panama, and *H. erato lativitta* from the Eastern slope of the Andes in Ecuador.  
27 Butterflies were caught using a hand net and transported live to the laboratory. In Panama, sample collection  
28 took place in May (early wet season) 2017 within three study areas situated along a rainfall gradient from the

29 Pacific to the Atlantic coast in the near vicinity of the Panama Canal, including six different locations within  
30 the Dry, three locations in the Intermediate (Int), and along a 5 km forest road in the Wet study areas.  
31 Meteorological and hydrological data are collected in or in the immediate vicinity of the three study sites by  
32 the Smithsonian Tropical Research Institute (STRI) Physical Monitoring Program  
33 ([https://biogeodb.stri.si.edu/physical\\_monitoring/](https://biogeodb.stri.si.edu/physical_monitoring/)). Although the distance between the two coasts is only  
34 about 65 km in the study region, it represents a steep rainfall gradient, with yearly rainfall (20-year average)  
35 of 3375 mm, 2720 mm, and 1881 mm in the Wet, Int, and Dry study areas, respectively. The average soil  
36 moisture content measured with a soil moisture meter (Digital Instruments Model PMS-714) at the time of  
37 sample collection was 27% (sd = 10%), 24% (sd = 10%), and 18% (sd = 8%) in the “Wet”, “Int” and “Dry”  
38 study areas, respectively.

39 All individuals caught from the Panamanian study areas ( $n = 92$ ) were sexed and weighed,  
40 and males were preserved in 1 ml 100% MeOH on the day of capture. MeOH preserves glycosylated and  
41 other stable polar compounds, including cyanogenic glycosides, by precipitating enzymes that degrade these  
42 compounds (Gleadow et al., 2011). MeOH is also the solvent used to extract these compounds from both  
43 sample types. We used this preservation method with both butterfly and plant samples. Before preservation  
44 as samples, females were kept in an outdoor insectary cage for 1-3 weeks (Dry, Int and Wet populations  
45 separately), where they were fed *ad libitum* with a 20% sugar solution enriched with protein concentrate  
46 supplemented with amino acids (Vetark Professional Critical Care Formula; two scoops per 1 l of sugar  
47 solution) and potted nectar plants (*Psychotria elata*), and were allowed to oviposit on potted *Passiflora*  
48 *biflora*. Of the butterfly samples, the body excluding wings and one half of the thorax were preserved in 1 ml  
49 100% MeOH.

50 At the Ecuadorian populations on the Eastern slope of the Andes, wild *H. erato lativitta* were  
51 collected in High (mean = 1200 m.a.s.l.) and Low altitude (mean = 400 m.a.s.l.). Fertilized females were  
52 brought to a common garden environment and kept in separate cages. Eggs were collected daily, and larvae  
53 raised in individual containers all through development, placed in randomly assorted positions in common  
54 garden insectary conditions. The thorax of 21 F1 individuals from each altitude (total  $n=42$ ) were sampled in  
55 1 ml 100% MeOH. We do not expect the sampled body part to influence estimates of cyanogenic glucoside

56 compound concentrations, as these compounds are located in the hemolymph, and are thus expected to be  
57 evenly distributed throughout the body (de Castro et al., 2020).

58 *Passiflora* leaf samples were collected from the Panamanian Dry ( $n = 20$ ), Int ( $n = 11$ ) and  
59 Wet ( $n = 20$ ) study areas. The *Passiflora* collected from the Dry and Int study areas were a typical variety of  
60 *Passiflora biflora*, whereas the plants collected in the Wet study area were a subspecies or closely related  
61 species of *P. biflora* (with a nearly identical cyanogenic profile, referred to hereafter as *P. biflora*). One to  
62 four leaves were sampled and pooled per plant individual starting from the third leaf from the growing tip of  
63 the vine, and the samples were preserved fresh in 1ml 100% MeOH. In addition, 50 cm cuttings, all from  
64 different plant individuals, were sampled from the “Dry” ( $n = 12$ ) and “Wet” ( $n = 12$ ) study areas for  
65 greenhouse cultivation.

66

#### 67 **Host plant greenhouse cultivation and treatments**

68 Standard (std)-treated *P. biflora* were cultivated in greenhouses (75% relative humidity; 8-20 hrs: 25°C,  
69 light; 20-8 hrs: 20°C, dark) for use as oviposition plants for the parental generation and larval diet of the F1  
70 families not included in feeding treatments. Std-plants were a greenhouse-cultivated stock of *P. biflora*  
71 established from plants originating from the Intermediate population in Panama. Vine cuttings were  
72 individually potted in a soil mixture (50% compost, 20% coir, 15% perlite, 15% sand or gravel), and watered  
73 three times weekly. The *P. biflora* cuttings collected from the Dry and Wet study areas were transported to  
74 the greenhouse and planted in pots with the same soil mixture as above. The watering treatments were  
75 initiated one month after potting when the plants had rooted and started new growth. Plants originating from  
76 the Dry and Wet study areas were divided equally into two watering treatments: the dry and wet treatments,  
77 leading to a total of four plant treatment groups. Plants in the wet treatment were watered three times weekly  
78 with soil remaining moist throughout the experiment. Additionally, wet-treated plants were placed near a  
79 hydrofogger (Hydrofogger 400 Simply Control), which increased relative humidity around the wet plants up  
80 to 100%. Plants in the dry treatment were kept at the standard 75% relative humidity and watered two to  
81 three times weekly with about 1/3 of the water volume compared to the wet treatment, such that the surface  
82 soil was allowed to dry and the leaves slightly droop between watering events. The dry treatment thus aimed  
83 to mimic conditions of drought stress. Exact volumes of water are not given, because the total amount of

84 water was adjusted based on the size of the plant at the time of watering (as the vines gain mass, they require  
85 increasing amounts of water). All plants were given general plant fertilizer once weekly.

86

### 87 **Butterfly rearing and breeding design**

88 Laboratory *H. erato* populations descendent of the wild Dry and Wet populations were established in  
89 greenhouse conditions (75% relative humidity; 8-20 hrs: 25°C, light; 20-8 hrs: 20°C, dark). Larvae were  
90 reared to adulthood on std-type *P. biflora*. All butterflies were marked with an individual identification  
91 number on the underside of the forewing. Butterflies were allowed to fly, mate, and oviposit freely in 2×2×2  
92 m mesh cages with potted host plants (*P. biflora* std-type), and were fed with a standardized sugar solution  
93 diet *ad libitum* (20% sugar solution enriched with protein concentrate supplemented with amino acids  
94 (Vetark Professional Critical Care Formula; two scoops per 1 l of sugar solution). The sugar solution was  
95 served from artificial flowers and was replaced every second day. Dry and Wet-originating populations were  
96 kept in separate cages. The Wet population was unfortunately lost due to an infection. The Dry population  
97 maintained population sizes above several tens of individuals even at the peak of the infection, and therefore  
98 the experiment was continued with the Dry population. The butterfly cages were observed throughout the  
99 day for mating pairs. Mating individuals were identified based on their id numbers, and once a mating event  
100 was completed, the mated female was moved to an individual 2×2×2 m mesh cage with potted host plants *P.*  
101 *biflora* (std-type), and with the standardized sugar solution diet available *ad libitum*. Eggs of each female (*n*  
102 = 14 mothers, of which 8 were mated with a known father, see Supplementary File 1) were collected twice  
103 weekly during the following two to three weeks following mating, and transferred into 60×35×35 cm mesh  
104 cages (with all full-sibling offspring of a female in one cage. Average no. of full-sibs/family = 8;  
105 Supplementary File 1) onto new growth harvested from std-type host plants. The vine cuttings were kept  
106 fresh by placing the end of each cutting through a hole in the lid of a water-filled container (which prevented  
107 the larvae from drowning). Fresh cuttings were added three times weekly, until all offspring had pupated. Six  
108 mated pairs (all with both mother and father known) and their offspring (average no. of full-sibs/family = 29,  
109 Supplementary File 1) were included in the feeding treatments, and the eggs of these six females were  
110 divided equally into four groups. Each group of eggs was transferred into separate 60×35×35 cm mesh cages  
111 onto new growth harvested from each of the four plant treatment groups. The cages were checked three times

112 weekly for emerged adults, which were weighed and preserved in 100% MeOH (body excluding wings and  
113 one-half of thorax). All F1 individuals were sampled within three days following emergence, when they were  
114 still unmated and unfed.

115

#### 116 **Butterfly toxicity analyses with <sup>1</sup>H-NMR**

117 The concentrations of the two cyanogenic compounds biosynthesized by *Heliconius* larvae and adults,  
118 linamarin and lotaustralin, were analyzed from the butterfly samples using nuclear magnetic resonance (<sup>1</sup>H-  
119 NMR). Sample extraction applied the procedure of Kim et al. (2010). The MeOH in which butterfly samples  
120 were preserved was evaporated and butterfly samples were dried by incubating at 45°C for 20 h. The dried  
121 samples were weighed (Denver Instrument SI-234, accuracy 0.1 mg) and homogenized in 2 ml Safe-Lock  
122 Eppendorph® tubes with an added sterile steel bead in an extraction/NMR solvent consisting of 400 µl  
123 KH<sub>2</sub>PO<sub>4</sub> buffer in D<sub>2</sub>O (pH 6.0) containing 0.1% (wt/wt) 3-(trimethylsilyl)propionic-2,2,3,3-d<sub>4</sub> acid sodium  
124 salt (TSP) and 400 µl Methanol-d<sub>4</sub> (CD<sub>3</sub>OD) 99.8%, using TissueLyser (Qiagen) at 30/s, 4\*20 sec.  
125 Subsequently, samples were vortexed at maximum speed for 1 min, sonicated for 20 min (Eurosonic 22), and  
126 centrifuged 15 min at 13.2\*10<sup>3</sup> rpm, before pipetting 625 µl of supernatant into a high-throughput NMR tube  
127 (Wilmad WG-1000-7 5\*177,8 mm).

128 <sup>1</sup>H-NMR was performed at the Finnish Biological NMR Center using Bruker Avance III HD  
129 NMR spectrometer (Bruker BioSpin, Germany) equipped with a cryogenic probe head and operated at <sup>1</sup>H  
130 frequency of 850.4 MHz. Measurements were performed at 25°C. A standard cpmgpr1d pulse program  
131 (Bruker BioSpin; Carr and Purcell 1954) was chosen, using 32 scans, 32,768 data points, a spectral width of  
132 10,204 Hz and a relaxation delay of 3 s. This pulse sequence is suitable for selective observation of small  
133 molecule components in solutions containing macromolecules. The data were processed and analyzed using  
134 Bruker TopSpin software (versions 3.2pl6 and 3.5pl6). The Free Induction Decays (FIDs) were multiplied by  
135 an exponential function equivalent to 0.3 Hz line-broadening factor before applying Fourier transformation.  
136 Transformed NMR spectra were corrected for phase distortions and calibrated according to the calibration  
137 compound TSP. The peaks of CNglcs compounds were identified based on comparison of sample <sup>1</sup>H spectra  
138 with the <sup>1</sup>H spectra of authentic reference samples of linamarin and lotaustralin. Concentrations of the  
139 CNglcs compounds were calculated based on the extracted areas of singlet peaks at 1.652 ppm

140 (epilotaustralin) and 1.668 ppm (lotaustralin), and a duplet peak at 1.698 ppm (linamarin), quantified based  
141 on the extracted area of the calibration compound (TSP), and corrected for the sample dry mass. The values  
142 of CNgles concentration in the wild-collected samples were normalized with a square-root-transformation  
143 before applying ANOVA to test for population differences in R 3.4.4 (R Core Team, 2018). Distributions of  
144 cyanogen traits were also explored by inspection of truncated weighted density distributions (accounting for  
145 the skewness of data towards near-zero values) using the “sm” R package (Bowman & Azzalini, 2014). For  
146 the analyses using common-garden data, untransformed values were used.

147

### 148 **Host plant toxicity and quality analyses**

149 The cyanogenic content of the host plant samples was analyzed using liquid chromatography-mass  
150 spectrometry (LC-MS/MS). A boiling method (Lai et al., 2015) was used for extraction, in which the leaf  
151 samples preserved in 1 ml 100% methanol were boiled for 5 min in a water bath. The samples were  
152 centrifuged at 10 000 g for 5 min, and the supernatant was filtered (Anapore 0.45 µm, Whatman), and diluted  
153 to 25%. Analytical LC-MS was carried out using an Agilent 1100 Series LC (Agilent Technologies,  
154 Germany) hyphenated to a Bruker HCT-Ultra ion trap mass spectrometer (Bruker Daltonics, Germany)  
155 following the procedure of Castro et al. (2019). Mass spectral data were analyzed with the native data  
156 analysis software (Compass DataAnalyses, Bruker Daltonics). CNgles were identified by the molecular mass  
157 of their sodium adducts and by their fragmentation pattern (MS/MS). The amount of each compound was  
158 calculated based on extracted ion chromatogram (EIC) peak areas and quantified based on calibration curves  
159 of amygdalin (in the case of passiflorin and passiflorin diglycoside) and linamarin (in the case of  
160 tetraphyllin A/deidaclin). Quantification was corrected for spectrometer measurement efficiency and the  
161 sample dry mass, which was measured following the drying of extracted leaf samples at 45°C for 48 h.

162 We also measured overall host plant quality to estimate differences in nutritional values of the  
163 greenhouse-cultivated plant treatment groups, because larval-acquired nitrogenous resources have been  
164 proposed as an important source for cyanogen biosynthesis (Cardoso & Gilbert, 2013). Plant quality traits  
165 were assessed with Dualex® Scientific+ leaf clip meter (Cerovic et al., 2012), which measures chlorophyll  
166 content in µg/cm<sup>2</sup>, epidermal flavonol content in absorbance units, nitrogen status (NBI: ratio between  
167 chlorophyll and flavonols; related to nitrogen/carbon allocation), and an anthocyanin index related to water-

168 soluble pigments abundant in newly forming leaves and those undergoing senescence. The measurements  
169 were taken from the third leaf from the growth tip on the same day across all six plant individuals of each *P.*  
170 *biflora* treatment group ( $n = 63$  measurements on average per treatment group). ANOVA including plant  
171 origin, treatment and their interaction was applied in R 3.4.4 (R Core Team, 2018) to test for differences in  
172 CNgles and plant quality traits between the treatment groups.

173

#### 174 **Details on the estimation of variance components, heritability, evolvability and maternal effects in** 175 ***Heliconius* biosynthesized cyanogenic toxicity**

176 When fixed effects are included in an animal model, the total random-effect variance is an underestimate of  
177 the total phenotypic variance ( $V_P$ ), because it does not account for the part of the variance explained by fixed  
178 effects (Villemereuil et al., 2018). To overcome this, we computed the variance components attributed to the  
179 fixed effects of sex and feeding treatment using the method of Villemereuil et al. (2018). Here the fixed  
180 variance component ( $V_F$ ) is calculated as  $V_F = V(X\hat{b})$ , where  $X$  is the matrix of the values of cofactors, and  $\hat{b}$   
181 are the parameter estimates (here, the parameter estimates obtained from the fitted animal models). The  
182 standard errors of these fixed-effect variance components were calculated as the square root of the sampling  
183 variance of a variance (Lynch & Walsh, 1998). When calculating heritabilities we included the variance due  
184 to sex in the total phenotypic variance, but we did not include the variance due to the treatment because this  
185 component of the variance is unlikely to represent natural variation (Villemereuil et al., 2018).

186

#### 187 **REFERENCES**

- 188 Arias, M., Meichanetzoglou, A., Elias, M., Rosser, N., de-Silva, D. L., Nay, B., & Llaurens, V. (2016). Variation  
189 in cyanogenic compounds concentration within a *Heliconius* butterfly community: Does mimicry  
190 explain everything? *BMC Evolutionary Biology*, *16*(1), 272. [https://doi.org/10.1186/s12862-016-](https://doi.org/10.1186/s12862-016-0843-5)  
191 [0843-5](https://doi.org/10.1186/s12862-016-0843-5)
- 192 Bowman, A. W., & Azzalini, A. (2014). *R package "sm": Nonparametric smoothing methods (version 2.2-5.5)*.  
193 <http://www.stats.gla.ac.uk/~adrian/sm>
- 194 Cardoso, M. Z., & Gilbert, L. E. (2013). Pollen feeding, resource allocation and the evolution of chemical  
195 defence in passion vine butterflies. *Journal of Evolutionary Biology*, *26*(6), 1254–1260.  
196 <https://doi.org/10.1111/jeb.12119>
- 197 Carr, H. Y., & Purcell, E. M. (1954). Effects of Diffusion on Free Precession in Nuclear Magnetic Resonance  
198 Experiments. *Physical Review*, *94*(3), 630–638. <https://doi.org/10.1103/PhysRev.94.630>
- 199 Cerovic, Z. G., Masdoumier, G., Ghozlen, N. B., & Latouche, G. (2012). A new optical leaf-clip meter for  
200 simultaneous non-destructive assessment of leaf chlorophyll and epidermal flavonoids. *Physiologia*  
201 *Plantarum*, *146*(3), 251–260. <https://doi.org/10.1111/j.1399-3054.2012.01639.x>

202 de Castro, É. C. P., Zagrobelny, M., Zurano, J. P., Cardoso, M. Z., Feyereisen, R., & Bak, S. (2019).  
203 Sequestration and biosynthesis of cyanogenic glucosides in passion vine butterflies and  
204 consequences for the diversification of their host plants. *Ecology and Evolution*, *9*(9), 5079–5093.  
205 <https://doi.org/10.1002/ece3.5062>

206 Gleadow, R., Bjarnholt, N., Jørgensen, K., Fox, J., & Miller, R. (2011). Cyanogenic glycosides. In *Research*  
207 *methods in plant sciences* (Vol. 1, pp. 283–310).

208 Hay-Roe, M. M., & Nation, J. (2007). Spectrum of Cyanide Toxicity and Allocation in *Heliconius erato* and  
209 *Passiflora* Host Plants. *Journal of Chemical Ecology*, *33*(2), 319–329.  
210 <https://doi.org/10.1007/s10886-006-9234-5>

211 Kerpel, S. M., & Moreira, G. R. P. (2005). Absence of Learning and Local Specialization on Host Plant  
212 Selection by *Heliconius erato*. *Journal of Insect Behavior*, *18*(3), 433–452.  
213 <https://doi.org/10.1007/s10905-005-3701-7>

214 Kim, H. K., Choi, Y. H., & Verpoorte, R. (2010). NMR-based metabolomic analysis of plants. *Nature Protocols*,  
215 *5*(3), 536–549. <https://doi.org/10.1038/nprot.2009.237>

216 Lai, D., Pičmanová, M., Abou Hachem, M., Motawia, M. S., Olsen, C. E., Møller, B. L., Rook, F., & Takos, A. M.  
217 (2015). *Lotus japonicus* flowers are defended by a cyanogenic  $\beta$ -glucosidase with highly restricted  
218 expression to essential reproductive organs. *Plant Molecular Biology*, *89*(1), 21–34.  
219 <https://doi.org/10.1007/s11103-015-0348-4>

220 Lynch, M., & Walsh, B. (1998). Expectations, Variances, and Covariances of Compound Variables. In  
221 *Genetics and Analysis of Quantitative Traits* (pp. 807–822). Oxford University Press.

222 Merrill, R. M., Naisbit, R. E., Mallet, J., & Jiggins, C. D. (2013). Ecological and genetic factors influencing the  
223 transition between host-use strategies in sympatric *Heliconius* butterflies. *Journal of Evolutionary*  
224 *Biology*, *26*(9), 1959–1967. <https://doi.org/10.1111/jeb.12194>

225 R Core Team. (2018). *R: A language and environment for statistical computing*. R Foundation for Statistical  
226 *Computing*. R Foundation for Statistical Computing, Vienna, Austria. <https://www.R-project.org/>

227 Supple, M. A., Hines, H. M., Dasmahapatra, K. K., Lewis, J. J., Nielsen, D. M., Lavoie, C., Ray, D. A., Salazar, C.,  
228 McMillan, W. O., & Counterman, B. A. (2013). Genomic architecture of adaptive color pattern  
229 divergence and convergence in *Heliconius* butterflies. *Genome Research*, *23*(8), 1248–1257.  
230 <https://doi.org/10.1101/gr.150615.112>

231 Turner, J. R. G. (1971). Experiments on the Demography of Tropical Butterflies. II. Longevity and Home-  
232 Range Behaviour in *Heliconius erato*. *Biotropica*, *3*(1), 21–31. JSTOR.  
233 <https://doi.org/10.2307/2989703>

234 Villemereuil, P. de, Morrissey, M. B., Nakagawa, S., & Schielzeth, H. (2018). Fixed-effect variance and the  
235 estimation of repeatabilities and heritabilities: Issues and solutions. *Journal of Evolutionary Biology*,  
236 *31*(4), 621–632. <https://doi.org/10.1111/jeb.13232>

237
